# Supplementary material for: Core–sheath structured bacterial cellulose/polypyrrole nanocomposites with excellent conductivity as supercapacitors
Source: Royal Society of Chemistry journal article supplement (doi:10.1039/c2ta00040g), 2012-10-22
Supplement: c2ta00040g.pdf [file c2ta00040g.pdf]

# Core-sheath Structured Bacterial Cellulose/Polypyrrole Nanocomposites with Excellent Conductivity as Supercapacitors

Huanhuan Wang, Linyi Bian, Peipei Zhou, Jian Tang and Weihua Tang\*

## Supplementary Information

**Preparation of BC/PPy conductive nanocomposites.** The BC/PPy conducting nanocomposites were prepared via in-situ oxidative polymerization of Py self-assembled onto BC nanofibers. By fine-tuning the reaction parameters including the feeding mass ratio of Py/BC (1:1 to 1/20), molar ratio of oxidizer  $\text{FeCl}_3/\text{Py}$  (0.25:1 to 1.25:1), molar ratio of dopant  $\text{HCl}/\text{Py}$  (0:1 to 1.4:1), composition of mixture solvent of  $\text{DMF}/\text{H}_2\text{O}$  (0:1 to 1.5:1), reaction temperature ( $0^\circ\text{C}$  to  $25^\circ\text{C}$ ), and reaction time (1 min to 24 h) in sequence, a large spectrum of BC/PPy nanocomposites were prepared. With the as-prepared nanocomposites at hand, the electrical conductivity was measured with a conventional four-point probe technique and morphology was observed via field-emission gun scanning electron microscopy (FESEM).

**Characterization.** FT-IR spectra were obtained using a Bomen MB154S Fourier transform infrared (FTIR) spectroscopy. The sample was cut into very little particles and characterized by a Fourier transform infrared spectrometer for the evaluation of chemical structures in the range of  $4000$  to  $500\text{ cm}^{-1}$  by accumulating 64 scans at a resolution of  $2\text{ cm}^{-1}$ .

Polymer surface composition was determined using X-ray photoelectron spectroscopy (XPS) (PHI-5300, Perkin Elmer) with a  $\text{Mg-K}\alpha$  excitation source ( $1253.6\text{ eV}$ ) at high- resolutions wide scans ( $71.55\text{ eV}$  analyzer pass energy). The

core-level signals were obtained at a photoelectron take off-angle ( $\alpha$ ) of  $45^\circ$  with respect to the samples surface. After linear background subtraction, N1s and O1s spectra were fitted with Gaussian component peaks allowing slight variations in the full-width at half maximum (fwhm) to reflect their chemical-state dependence.<sup>1</sup> Binding energies (BE) were referenced to the maxima in the smoothed C1s envelopes, defined at 285.0 eV,<sup>2</sup> to compensate for surface-charging. Surface atomic stoichiometries were obtained from peak areas corrected with experimental sensitivity factors and are expected to have a  $\pm 10\%$  error.

X-ray diffraction (XRD) patterns were recorded on an X-ray diffractometer (D8 Advance, Bruker, Germany) by using Cu K $\alpha$  radiation at 40kV and 30mA. The diffraction angle was ranged from 10 to  $45^\circ$ . The crystallinity index was calculated as the ratio of the area of the resolved crystalline peaks to the total area of a diffraction profile for 10 to  $45^\circ$ . The crystallite size was estimated from the integrated width of the resolved crystalline peak by using Scherrer's equation.

The thermal stability of BC and BC/PPy nanocomposites was carried out with a Mettler Toledo SDTA815<sup>o</sup> thermogravimetric analyser. All analyses were performed with 1.9 mg samples in aluminum pans and were heated from 50 and 800 $^\circ$ C at a scanning rate of 20 K/min in the presence of a 30 ml/min nitrogen flow.

For field-emission gun scanning electron microscopy (FESEM) observations, samples of BC and PPy/BC nanocomposites were sputtered with gold. The morphology of BC and PPy/BC nanocomposites was observed with a Hitachi S4800 FESEM at an accelerating voltage of 15 kV. For fracture surface observations the composites were immersed in liquid nitrogen and subsequently fractured.

**XPS spectra analysis.** The binding energy (BE) for Curve-resolved C1s and O1s core levels of BC and C1s, O1s, N1s and Cl2p core levels of pristine PPy and BC/PPy composites were summarized in Table S1.

**Table S1.** Curve-resolved C1s and O1s core levels of BC and C1s, O1s, N1s and Cl2p core levels of BC/PPy composites<sup>2-4</sup>

| BE(eV)  | C1s |      |          |       | O1s  |      | N1s |      |                   | Cl2p            |                   |     |
|---------|-----|------|----------|-------|------|------|-----|------|-------------------|-----------------|-------------------|-----|
| Samples | C-H | C-OH | C=O, C-N | O-C-O | C-OH | C-OC | -N= | -NH- | -N <sup>+</sup> - | Cl <sup>-</sup> | Cl <sup>+</sup> * | -Cl |

|         |       |       |       |       |       |       |       |       |       |       |       |       |
|---------|-------|-------|-------|-------|-------|-------|-------|-------|-------|-------|-------|-------|
| BC      | 281.0 | 283.2 | 285.0 | 286.2 | 528.6 | 531.3 |       |       |       |       |       |       |
| PPy     |       |       |       |       |       |       | 397.8 | 399.3 | 401.1 |       |       |       |
| *BC/PPy | 284.1 | 285.4 | 287.0 | 288.4 | 531.4 | 533.5 | 398.7 | 399.9 | 401.2 | 197.1 | 198.5 | 199.8 |

\*BC/PPy refers to the BC/PPy composites prepared under the optimized reaction conditions.

**Proposed mechanism for PPy coating onto BC nanofibers.** According to the morphology evolution during fine-tuning reaction parameters for PPy coating, the synthesis mechanism of BC/PPy nanocomposites was speculated and shown in Figure S1. It can be clearly seen that three processes were: (a) pyrrole monomer be dispersed into the 3D-network of BC nanofibers in the medium of DMF/H<sub>2</sub>O (DMF played an important role in dispersing process, which could be proven by the surface area and FESEM images of materials); (b) the polymerization coincided with the doping process by oxidant of FeCl<sub>3</sub> and dopant of HCl; (c) PPy/BC nanocomposites were formed after filtration and lyophilization.

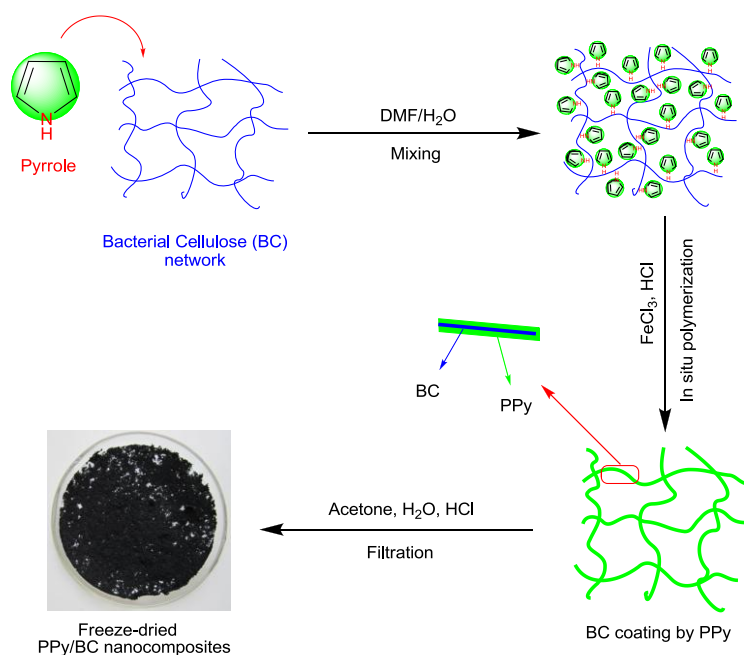

**Figure S1.** Schematic illustration of the process of preparation of PPy/BC in DMF/H<sub>2</sub>O solvent.

**TGA analysis:** The thermal stability of as-prepared BC/PPy nanocomposite was studied by thermal gravimetric analysis (TGA).

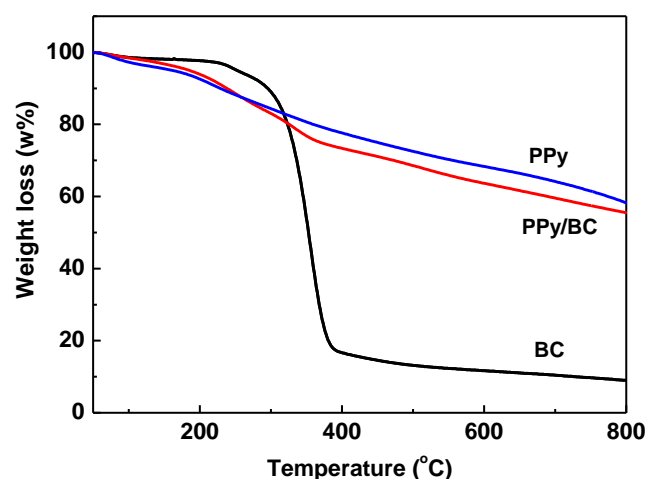

**Figure S1.** TG curves of pure BC, pure PPy and PPy/BC nanocomposites.

## References

1. Chan, H. S. O., Ho, P. K. H., Ng, S. C., Tan, B. T. G. & Tan, K. L. A new water-soluble, self-doping conducting polyaniline from poly(o-aminobenzylphosphonic acid) and its sodium salts: synthesis and characterization. *J. Am. Chem. Soc.* **117**, 8517-8523 (1995).
2. Kang, E. T., Neoh, K. G., Ong, Y. K., Tan, K. L. & Tan, B. T. G. X-ray photoelectron spectroscopic studies of polypyrrole synthesized with oxidative Fe (III) salts. *Macromolecules* **24**, 2822-2828 (1991).
3. Wang, J., Neoh, K. G., Kang, E. T. Comparative study of chemically synthesized and plasma polymerized pyrrole and thiophene thin films. *Thin Solid Films* **446**, 205-217 (2004).
4. Ding, C., Qian, X., Yu, G., An, X. Dopant effect and characterization of polypyrrole-cellulose composites prepared by in situ polymerization process. *Cellulose* **17**, 1067-1077 (2010).
